# Supplementary material for: Autophagy and mitophagy biomarkers are reduced in sera of patients with Alzheimer’s disease and mild cognitive impairment
Source: PubMed Central journal article supplement (PMC6934625; doi:10.1038/s41598-019-56614-5), 2019-12-27
Supplement: 41598_2019_56614_MOESM1_ESM.pdf [file 41598_2019_56614_MOESM1_ESM.pdf]

## SUPPLEMENTARY INFORMATIONS

### TITLE

Autophagy and mitophagy biomarkers are reduced in sera of patients with Alzheimer's disease and mild cognitive impairment

### AUTHORS

Massimiliano Castellazzi,<sup>1,2,\*</sup> Simone Patergnani,<sup>3,4,\*</sup> Mariapina Donadio,<sup>1</sup> Carlotta Giorgi,<sup>3</sup> Massimo Bonora,<sup>3</sup> Cristina Bosi,<sup>5</sup> Gloria Brombo,<sup>6</sup> Maura Pugliatti,<sup>1,2</sup> Davide Seripa,<sup>7</sup> Giovanni Zuliani,<sup>6,§</sup> Paolo Pinton,<sup>3,4,§</sup>

<sup>1</sup>Department of Biomedical and Specialist Surgical Sciences, section of Neurological, Psychiatric and Psychological sciences, University of Ferrara, Ferrara, Italy

<sup>2</sup>Interdepartmental Research Center for the Study of Multiple Sclerosis and Inflammatory and Degenerative Diseases of the Nervous System, University of Ferrara, Ferrara, Italy

<sup>3</sup>Department of Morphology, Surgery and Experimental Medicine, Section of Pathology, Oncology and Experimental Biology, Laboratory for Technologies of Advanced Therapies (LTTA), University of Ferrara, Ferrara, Italy

<sup>4</sup>Maria Cecilia Hospital, GVM Care & Research, Cotignola, Ravenna, Italy;

<sup>5</sup>Department of Morphology, Surgery and Experimental Medicine, Section of Anatomic Pathology, University of Ferrara, Ferrara, Italy

<sup>6</sup>Department of Morphology, Surgery and Experimental Medicine, Section of Internal Medicine, University of Ferrara, Ferrara, Italy

<sup>7</sup>Gerontology and Geriatric Research Laboratory, IRCCS Casa Sollievo della Sofferenza, San Giovanni Rotondo, Foggia, Italy

**\*equally contributed**

**§Corresponding author:**

Professor Paolo Pinton, Department of Morphology, surgery and experimental Medicine, section of Pathology, Oncology and experimental Biology, Laboratory for technologies of Advanced therapies (LTTA), University of Ferrara, Ferrara, Italy; [paolo.pinton@unife.it](mailto:paolo.pinton@unife.it)

Professor Giovanni Zuliani, Department of Morphology, Surgery and Experimental Medicine, Section of Internal Medicine, University of Ferrara, Ferrara, Italy; [giovanni.zuliani@unife.it](mailto:giovanni.zuliani@unife.it)

To confirm the role of auto/mitophagy in our population of patients, another molecule, Beclin-1<sup>1,2</sup> was measured in 80 subjects: 16 patients (8 females and 8 males) were analyzed for each subgroup.

## **Materials and methods**

### *Serum levels of Beclin-1 determination*

Serum concentrations of Beclin-1 were determined by using commercially available enzyme-linked immunosorbent assay kits (My Biosource MBS732891, San Diego, California, USA) following the manufacturer's instructions.

## **Results**

### *Serum levels of Beclin-1*

As reported in figure 2 (panel A) serum levels of Beclin-1 were statistically different among the groups (Kruskal-Wallis test:  $p < 0.0001$ ). In particular, serum median levels of Beclin-1 were more elevated in controls (53.69 ng/ml) than in AD (19.84 ng/ml), MD (30.47 ng/ml) and MCI (28.88 ng/ml) (Dunn's post hoc test:  $p = 0.0004$ ,  $p = 0.0471$  and  $p = 0.0253$ , respectively) and in VAD and VAD (69.93 ng/ml) than in AD, MD and MCI (Dunn's post hoc test: all  $p < 0.0001$ ). Moreover, in all patients analyzed as a whole, serum levels of Beclin-1 were positively correlated to Parkin ( $r = 0.5786$ ) and to ATG5 ( $r = 0.5318$ ) (Spearman: both  $p < 0.0001$ ) (Figure 2, Panels B and C).

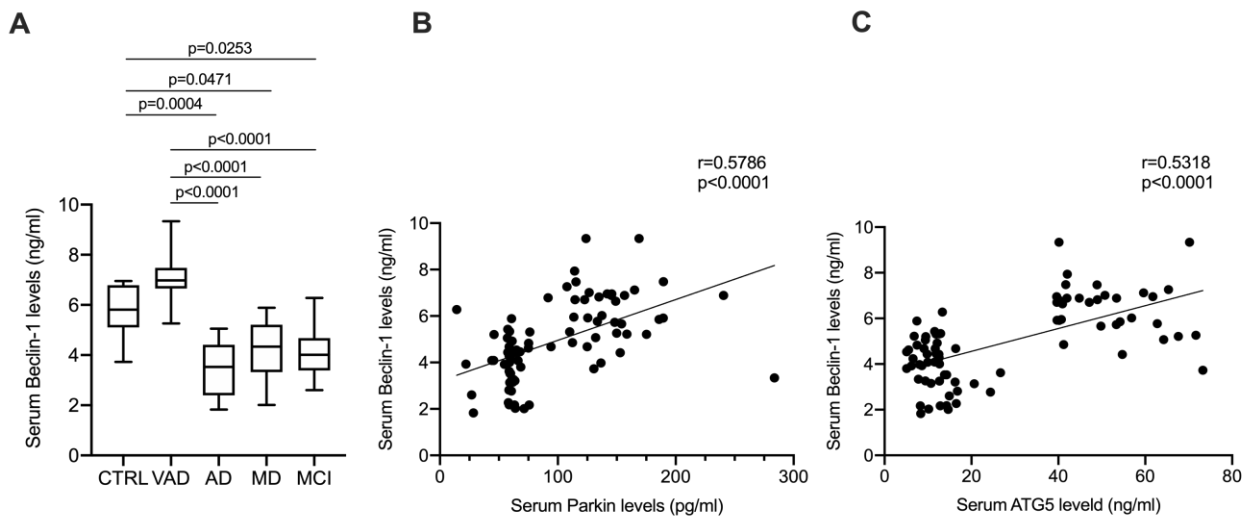

### Supplementary Figure 1.

Serum levels of Beclin-1 in sera of patients affected by Alzheimer's disease (AD), vascular dementia (VAD), mild cognitive impairment (MCI), "mixed" dementia (MD) and without signs of cognitive impairment as sex-matched controls. **Panel A:** Beclin-1 levels were different among groups (Kruskal-Wallis;  $p<0.0001$ ), in particular in post hoc analysis (Dunn's post hoc test) median ATG5 values were more elevated in Controls and VAD than in AD ( $p=0.0004$  and  $p<0.0001$ ), MCI ( $p=0.0253$  and  $p<0.0001$ ) and MD ( $p=0.0471$  and  $p<0.0001$ ). **Panel B and C:** Beclin-1 levels were positively correlated to Parkin and ATG5 concentrations ( $r=0.5786$  and  $r=0.5318$ , respectively) (Spearman: both  $p<0.0001$ ) in the patient population analyzed as a whole.

### References for Supplementary Information

- 1 Liang, X. H. *et al.* Induction of autophagy and inhibition of tumorigenesis by beclin 1. *Nature* **402**, 672-676, doi:10.1038/45257 (1999).
- 2 Hill, S. M., Wrobel, L. & Rubinsztein, D. C. Correction to: Post-translational modifications of Beclin 1 provide multiple strategies for autophagy regulation. *Cell death and differentiation* **26**, 2810, doi:10.1038/s41418-019-0346-1 (2019).
